# Supplementary material for: Interactions between the Yeast SM22 Homologue Scp1 and Actin Demonstrate the Importance of Actin Bundling in Endocytosis
Source: PubMed Central journal article supplement — J Biol Chem. 2008 May 30;283(22):15037–46. doi: 10.1074/jbc.M710332200 (PMC2397485; doi:10.1074/jbc.m710332200), 2008-05-30

## Supplementary Material

1 Figure and 3 Tables

### Figure Legend

Supplementary Figure 1 Rhodamine-phalloidin staining of actin structures in actin alleles. Polarised cortical actin patches (arrowhead) and actin cables (arrow) are visible in strains expressing wild-type actin (A), *act1-102* (B), *act1-157* (C). Depolarised cortical actin patches with few or no actin cables are observed in cells expressing *act1-115* (D). Visualisation of the cells was performed using an Olympus BX60 fluorescence microscope. (Bar: 10  $\mu\text{m}$ , Exposure time: 500 msec)

**Supplementary Table 1. Yeast strains**

| <b>Strain</b>   | <b>Genotype</b>                                                                                          | <b>Origin/ Reference</b> |
|-----------------|----------------------------------------------------------------------------------------------------------|--------------------------|
| <b>KAY 141</b>  | MATa <i>his3Δ200 leu2-3.112 ura3-52 cry1 can1-1 tub2-201 (benR) act1-133::HIS3</i>                       | DDY336 (D.Drubin)        |
| <b>KAY 143</b>  | MATa <i>ura3-52 leu2-3.112 his3Δ200 cry1 can1-1 tub2-201 act1-101::HIS3</i>                              | DDY338(D.Drubin)         |
| <b>KAY 166</b>  | MATα <i>ura3-52 leu2-3.112 his3Δ200 can1-1 ade4 cry1 tub2-201 act1-102:: HIS3</i>                        | DDY339 (D.Drubin)        |
| <b>KAY 147</b>  | MATα <i>ura3 leu2 his3 can1-1 tub2-201 act1-113::HIS3</i>                                                | DDY342 (D.Drubin)        |
| <b>KAY 172</b>  | MATα <i>ura3-52 leu2 his3 can1-1 tub2-201 act1-115::HIS3</i>                                             | DDY343 (D.Drubin)        |
| <b>KAY 151</b>  | MATa <i>ura3 leu2 his3 ade2 cry1 bry2-201 act1-119::HIS3</i>                                             | DDY346 (D.Drubin)        |
| <b>KAY 152</b>  | MATa <i>ura3-52 leu2-3.112 his3Δ200 cry1 tub2-201 can1-1 act1-120::HIS3</i>                              | DDY347 (D.Drubin)        |
| <b>KAY 156</b>  | MATα <i>ura3 leu2 his3 tub2-201 can1-1 act1-129::HIS3 (R177A, D179A)</i>                                 | DDY351 (D.Drubin)        |
| <b>KAY159</b>   | MATa <i>ura3 leu2 his3 cry1 tub-201 ACT1::HIS3</i>                                                       | DDY354 (D.Drubin)        |
| <b>KAY 207</b>  | MATa <i>ura3-52 leu2-3.112 his3Δ200 ade2-101 (am) can1 cry1 + CEN ACT1:: HIS3</i>                        | DBY7062 (D.Botstein)     |
| <b>KAY 208</b>  | MATa <i>ura3-52 leu2-3.112 his3Δ200 ade2-101 (am) can1 cry1 + CEN ACT1:: act1-45 HIS3 (I341A)</i>        | DBY7063 (D.Botstein)     |
| <b>KAY 209</b>  | MATa <i>ura3-52 leu2-3.112 his3Δ200 ade2-101 (am) can1 cry1 + CEN ACT1:: act1-53 HIS3 (I345A)</i>        | DBY7064 (D.Botstein)     |
| <b>KAY 210</b>  | MATa <i>ura3-52 leu2-3.112 his3Δ200 ade2-101 (am) can1 cry1 + CEN ACT1:: act1-54 HIS3 (Y166T)</i>        | DBY7067 (D.Botstein)     |
| <b>KAY 211</b>  | MATa <i>ura3-52 leu2-3.112 his3Δ200 ade2-101 (am) can1 cry1 + CEN ACT1:: act1-57 HIS3 (I341K)</i>        | DBY7072 (D.Botstein)     |
| <b>KAY 212</b>  | MATa <i>ura3-52 leu2-3.112 his3Δ200 ade2-101 (am) can1 cry1 + CEN ACT1:: act1-61 HIS3 (Y166A)</i>        | DBY7075 (D.Botstein)     |
| <b>KAY 213</b>  | MATa <i>ura3-52 leu2-3.112 his3Δ200 ade2-101 (am) can1 cry1 + CEN ACT1:: act1-62 HIS3 (F169A)</i>        | DBY7076 (D.Botstein)     |
| <b>KAY 214</b>  | MATa <i>ura3-52 leu2-3.112 his3Δ200 ade2-101 (am) can1 cry1 + CEN ACT1:: act1-63 HIS3 (Y166A, F169A)</i> | DBY7078 (D.Botstein)     |
| <b>KAY 1199</b> | MATα <i>tub2-201 his3Δ200 leu2-3.112 ura3-52 act1-157::HIS3</i>                                          | This study               |
| <b>KAY 446</b>  | MATa, <i>his3Δ1 leu2Δmet15Δura3Δ</i>                                                                     | Invitrogen BY4741        |
| <b>KAY 448</b>  | MATa <i>Δscp1::KanMx his3Δ leu2Δ met15Δ ura3Δ</i>                                                        | Invitrogen               |
| <b>KAY 593</b>  | MATa <i>Δsac1::KanMx his3Δ leu2Δ met15Δ ura3Δ</i>                                                        | Invitrogen               |
| <b>KAY 1242</b> | MATa <i>Δscp1::KanMx his3Δ leu2Δ met15Δ ura3Δ, sac6Δ:: LEU2</i>                                          | This study               |
| <b>KAY 684</b>  | MATα <i>Sac6-RFP::KanMx his3Δ1 leu2Δ0 lys2Δ0 ura3Δ0</i>                                                  | Huh et al., 2003         |
| <b>KAY1178</b>  | MATa, <i>his3Δ1 leu2Δmet15Δura3Δ, SCP1-GFP</i>                                                           | Invitrogen               |
| <b>KAY1199</b>  | MATα <i>his3Δ200, leu2-3,112,ura3-52, act1-157::HIS3</i>                                                 | This study               |
| <b>KAY1304</b>  | As KAY159 + Abp1mRFP                                                                                     | This study               |
| <b>KAY1305</b>  | As KAY166 + Abp1mRFP                                                                                     | This study               |
| <b>KAY1306</b>  | As KAY172 + Abp1mRFP                                                                                     | This study               |

|                |                                          |            |
|----------------|------------------------------------------|------------|
| <b>KAY1307</b> | As KAY1199 + Abp1mRFP                    | This study |
| <b>DGY157</b>  | BY4741 <i>Scp1</i> (1-154):: <i>HIS5</i> | This study |
| <b>DGY159</b>  | BY4741 <i>Scp1</i> (1-172):: <i>HIS5</i> | This study |

**Supplementary Table 2. Plasmids**

| <b>Plasmid name</b> | <b>Description</b>                                                                                                            | <b>Origin/<br/>Reference</b>  |
|---------------------|-------------------------------------------------------------------------------------------------------------------------------|-------------------------------|
| <b>pKA 88</b>       | GFP- <i>ABP1</i> under the control of the <i>ACT1</i> promoter and terminator                                                 | Gift-D. Botstein, Princeton   |
| <b>pKA 211</b>      | Scp1 cloned between NdeI and SalI sites on the pSJW1 vector (2585 bp, AmpR); used for Scp1p purification                      | (5)                           |
| <b>pKA 148</b>      | PCR template used to create <i>SCPI</i> deletions and truncations using the <i>HIS 3</i> cassette                             | (12)                          |
| <b>pKA280</b>       | p416 CEN URA MET 25 promoter - <i>SCPI</i>                                                                                    | (5)                           |
| <b>pKA281</b>       | p426 2 $\mu$ URA MET 25 promoter - <i>SCPI</i> 2 $\mu$                                                                        | (5)                           |
| <b>B4189</b>        | GFP-Scp1 expressed under the control of the <i>SCPI</i> native promoter (contains two polymorphisms at positions 394 and 420) | Gift-G. Fink, Whitehead Inst. |
| <b>pKA 491</b>      | pET14b vector containing Scp1 $\Delta$ 180 (expresses 6 x His-Scp1 $\Delta$ 180)                                              | This study                    |
| <b>pKA 501</b>      | pET14b vector containing Scp1 full length cloned between the NdeI and the Sal I sites (6 x His- Scp1)                         | This study                    |
| <b>pKA 504</b>      | A point mutation was introduced at position 172 in Scp1 in B4189                                                              | This study                    |
| <b>pKA 505</b>      | A point mutation was introduced at position 180 in Scp1 in B4189                                                              | This study                    |
| <b>pKA 530</b>      | A point mutation was introduced at position 154 in Scp1 in B4189                                                              | This study                    |
| <b>pKA542</b>       | A point mutation was introduced to generate S185A in Scp1 in B4189                                                            | This study                    |
| <b>pKA543</b>       | A point mutation was introduced to generate S185D in Scp1 in B4189                                                            | This study                    |
| <b>pKA474</b>       | PCR template plasmid used to create <i>SAC6</i> deletions <i>LEU2</i>                                                         | Gift-D.Drubin                 |

### Supplementary Table 3 Oligonucleotides used in this study

| OLIGO          | SEQUENCE                                                                  | Notes                |
|----------------|---------------------------------------------------------------------------|----------------------|
| <b>oKA313</b>  | CTAGGACCACAACCTGTCAATCTAGAAGCCAAGACCCCCGGTT                               | IVM for Sep1Δ154     |
| <b>oKA314</b>  | AACCGGGGGTCTTGGCTTCTAGATTGACAGTTGTGGTCCCTAG                               | IVM for Sep1Δ154     |
| <b>oKA 315</b> | CATCTACAAGATGGTACTGTCTAGAGTACTTTTGAATACGGT                                | IVM for Sep1Δ172     |
| <b>oKA 316</b> | ACCGTATTCAAAAAGTGCTCTAGACAGTACCATCTTGTAGATG                               | IVM for Sep1Δ172     |
| <b>oKA 317</b> | TGGAGCACTTTTGAATACGTCTAGATGAAAGGTGCATCTCAG                                | IVM for Sep1Δ180     |
| <b>oKA 318</b> | CTGAGATGCACCTTTCATCTAGACGTATTCAAAAAGTGCTCCA                               | IVM for Sep1Δ180     |
| <b>oKA 319</b> | GGTTATATGAAAGGTGCAGCTCAGGCTACTGAAGGAGTG                                   | IVM for Sep1S185A    |
| <b>oKA 320</b> | CACTCCTTCAGTAGCCTGAGCTGCACCTTTCATATAACC                                   | IVM for Sep1S185A    |
| <b>oKA 321</b> | GGTTATATGAAAGGTGCAGATCAGGCTACTGAAGGAGTG                                   | IVM for Sep1S185D    |
| <b>oKA 322</b> | CACTCCTTCAGTAGCCTGATCTGCACCTTTCATATAACC                                   | IVM for Sep1S185D    |
| <b>oKA 690</b> | TATCAGAGAAGAAGCTGATATATTAGCCCTAAGGAGTACACCAAAACACAT<br>CGAGGTCGACGGTATC   | Δsac6 deletion 5'    |
| <b>oKA 691</b> | TGGAACAAGAAAGCTGAGTAGAAAACAGGTTACGAAAGTTGTTTGTGGCC<br>GCTCTAGAAGTAGTGGATC | Δsac6 deletion 3'    |
| <b>oKA 692</b> | GTTCCCGATGGCCTTCATGTG                                                     | Δsac6 deletion check |
| <b>oKA 693</b> | GGAATCATTTGAGCGTTGGAGGC                                                   | Δsac6 deletion check |

Supplementary Figure 1

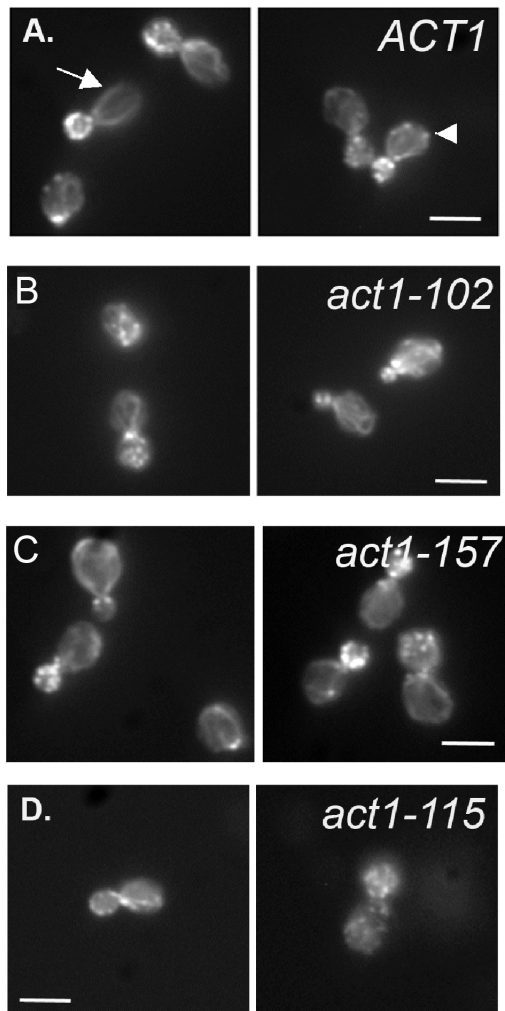

Supplement: M710332200_1.pdf [file M710332200_1.pdf]
